# Supplementary material
Source: publisher figshare collection journal article supplement (https://gsajournals.figshare.com/ndownloader/files/22007643)
Supplement: Supplementary file 1 [file 22007643]

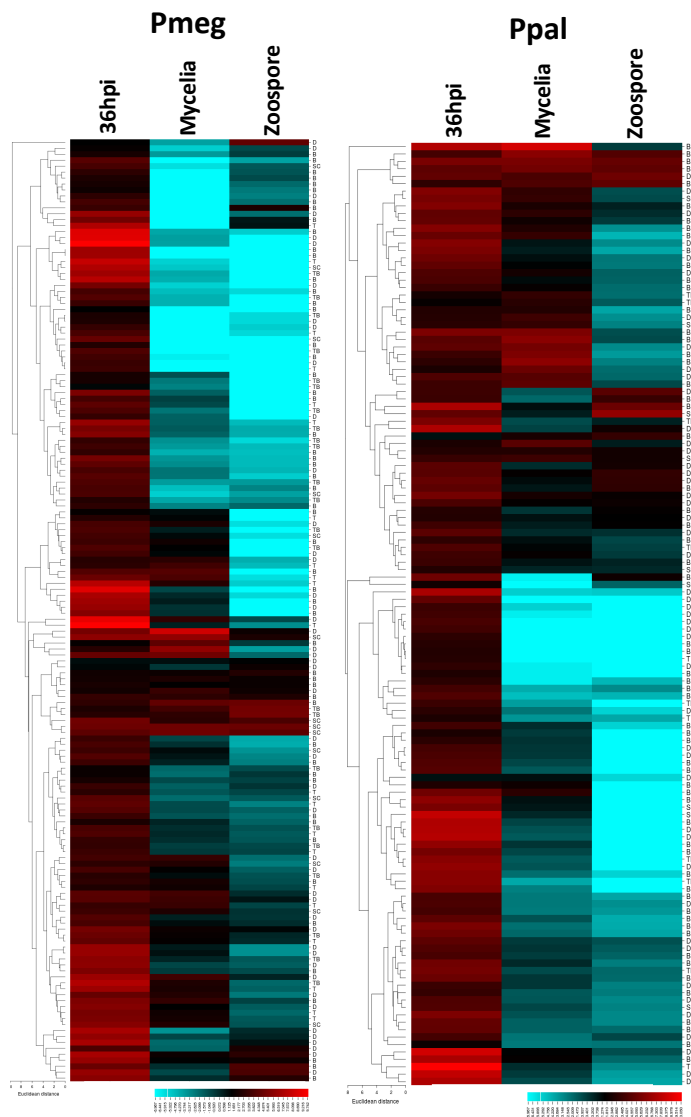

**Figure S8. Transcription profile of the *P. megakarya* (Pm1) and *P. palmivora* (Pp2) RxLRs detected *in planta*.** For the relative transcription profiles, *Pmeg* (A) and *Ppal* (B) RxLRs detected in at least three of the four biological replicates (with  $\geq 1$  paired read) of 36hpi *in planta* samples were normalized and Log<sub>10</sub> transformed. The heat map was generated using CIMminer
